# Supplementary material
Source: ML conference proceedings conference paper supplement (https://proceedings.mlr.press/v33/min14.html)
Supplement: Supplementary file 1 [file min14-supp.pdf]

---

# Interpretable Sparse High-Order Boltzmann Machines (Supplementary Materials)

---

**Martin Renqiang Min**  
NEC Labs America

**Xia Ning**  
NEC Labs America

**Chao Cheng**  
Dartmouth College

**Mark Gerstein**  
Yale University

## Acknowledgement

We thank anonymous reviewers for insightful comments and suggestions. We thank Alexandru Niculescu-Mizil, Yanjun Qi, and Bing Bai for helpful discussions.

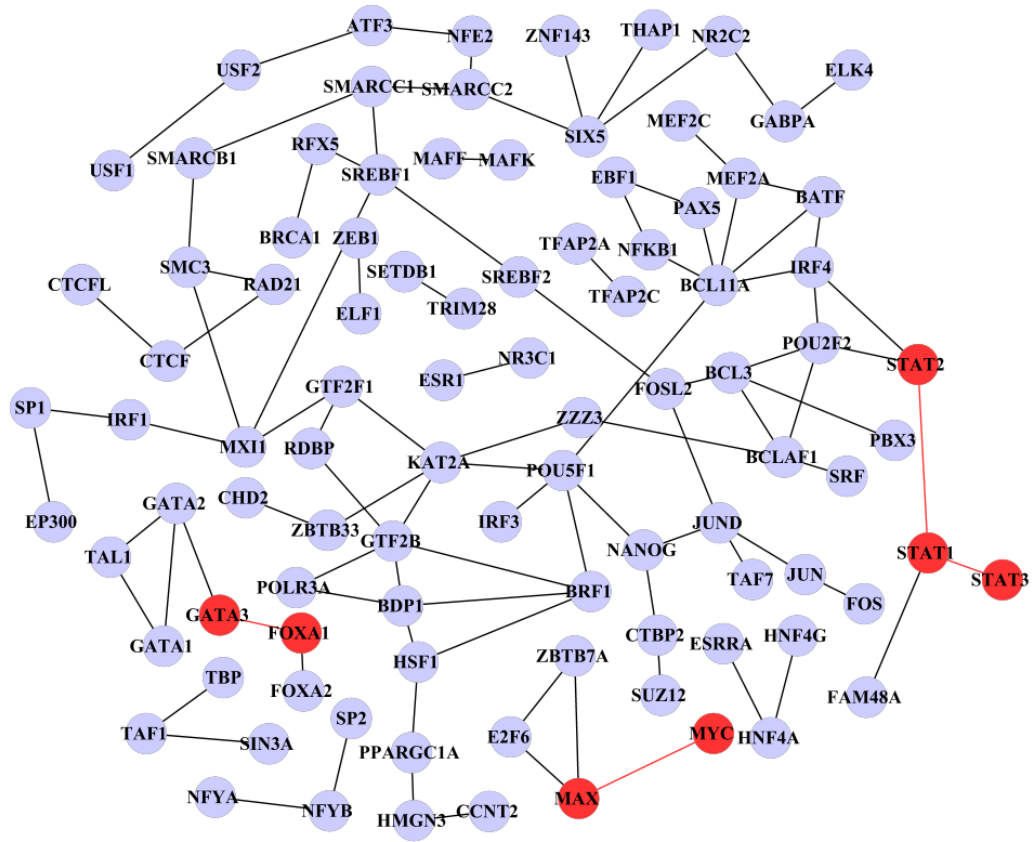

Figure 1: Interactions from SHBM with GS

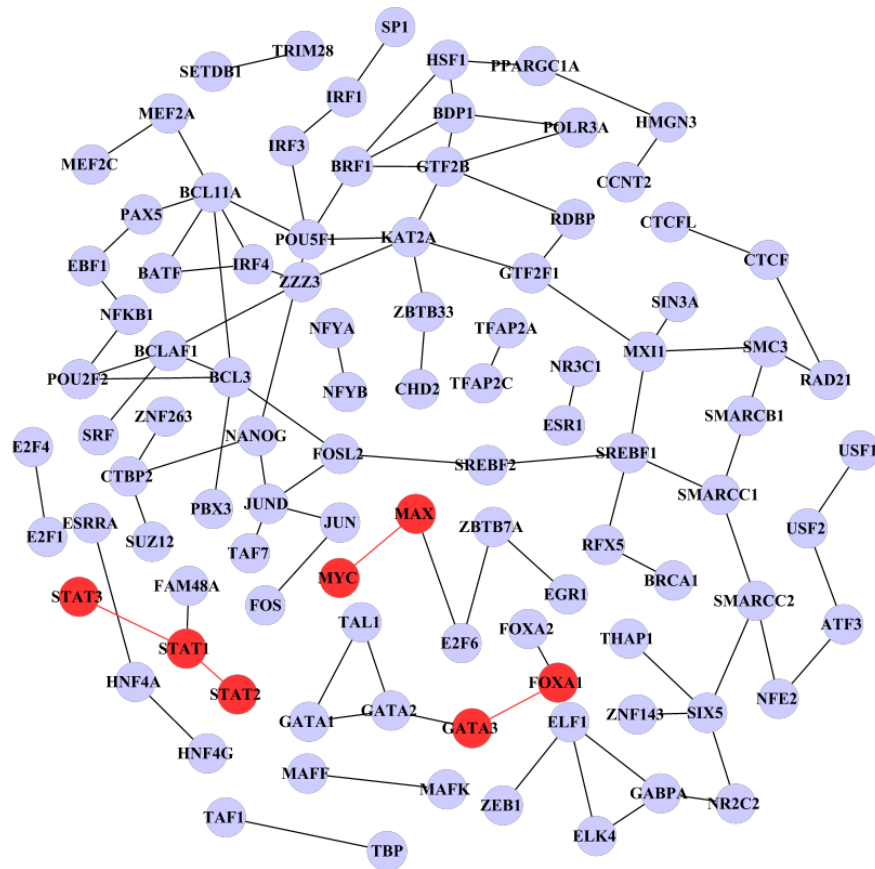

Figure 2: Interactions from SHBM with MF

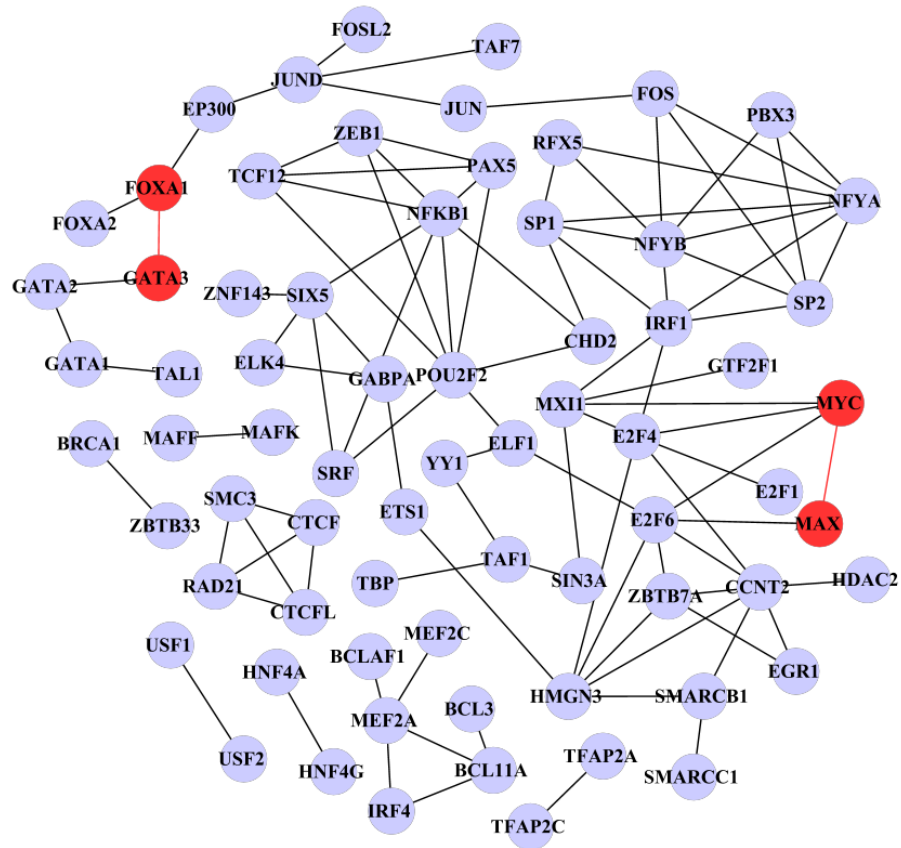

Figure 3: Interactions from BM with GS

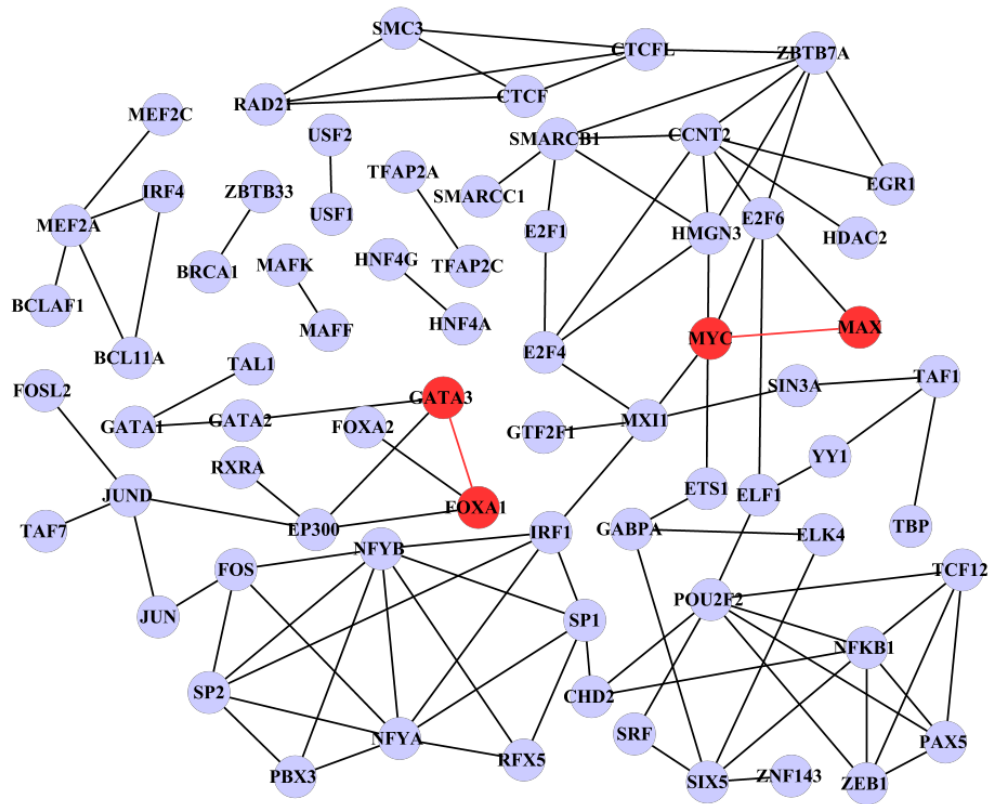

Figure 4: Interactions from BM with MF

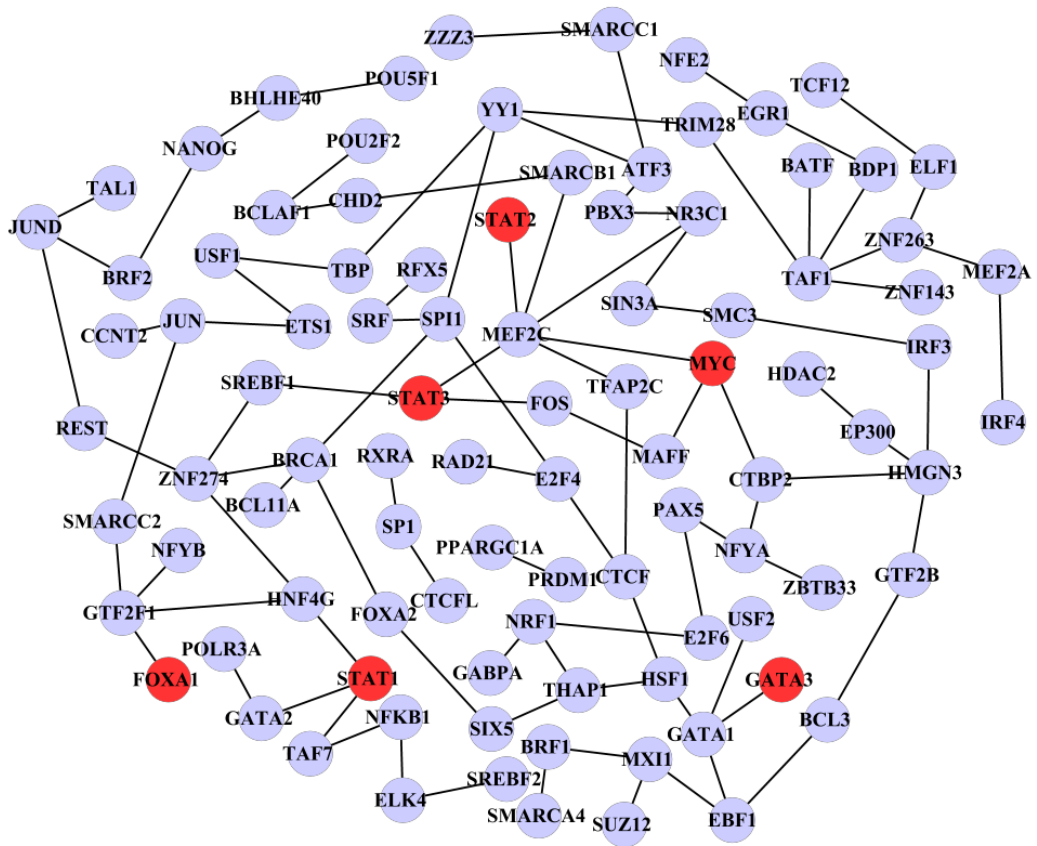

Figure 5: Interactions from BN
